# Supplementary material for: Vibrio cholerae ParE2 Poisons DNA Gyrase via a Mechanism Distinct from Other Gyrase Inhibitors
Source: PubMed Central journal article supplement — J Biol Chem. 2010 Oct 15;285(51):40397–408. doi: 10.1074/jbc.M110.138776 (PMC3001019; doi:10.1074/jbc.m110.138776), 2010-10-15

Supplemental Figure 1

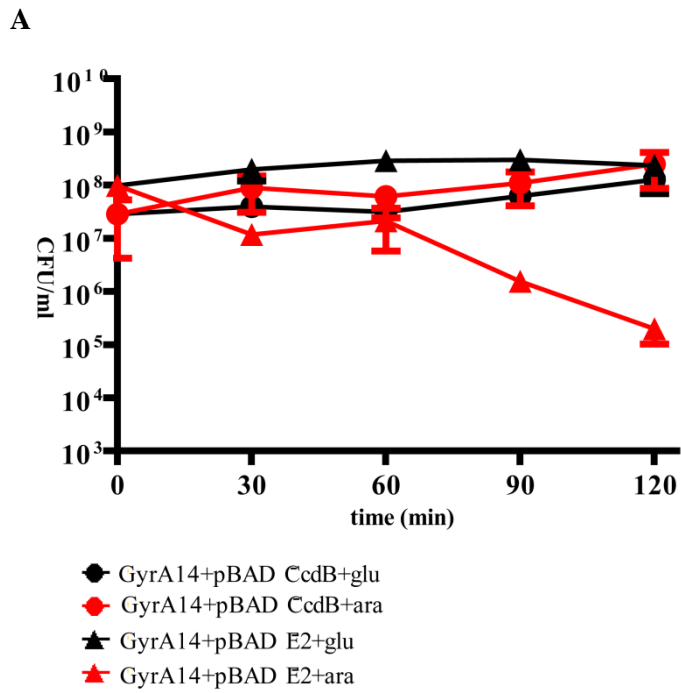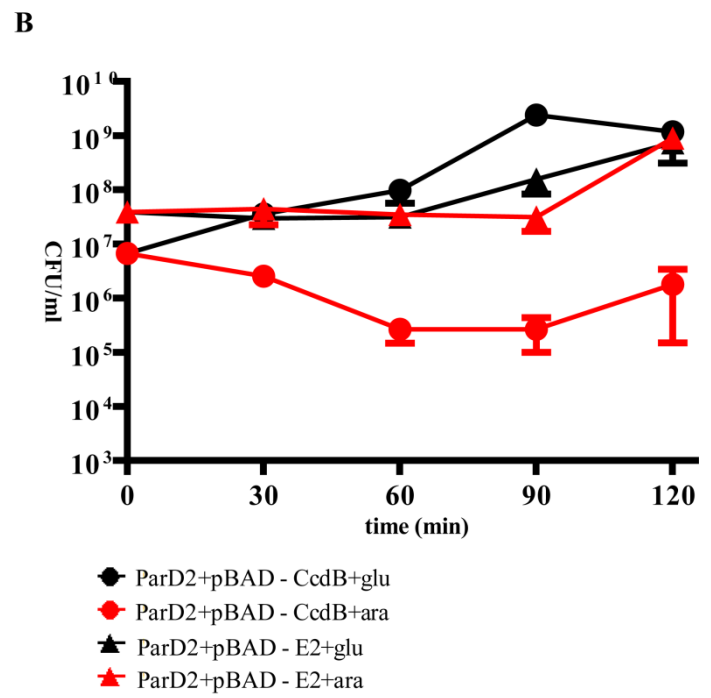

## Supplemental Figure 2

|              |   |   |   |   |   |   |   |   |
|--------------|---|---|---|---|---|---|---|---|
| <b>Gyr</b>   | - | + | + | + | + | + | + | + |
| <b>Nal</b>   | - | - | - | + | - | - | - | - |
| <b>ParE2</b> | - | - | - | - | + | + | + | + |
| <b>ParD2</b> | - | - | + | - | - | + | + | + |

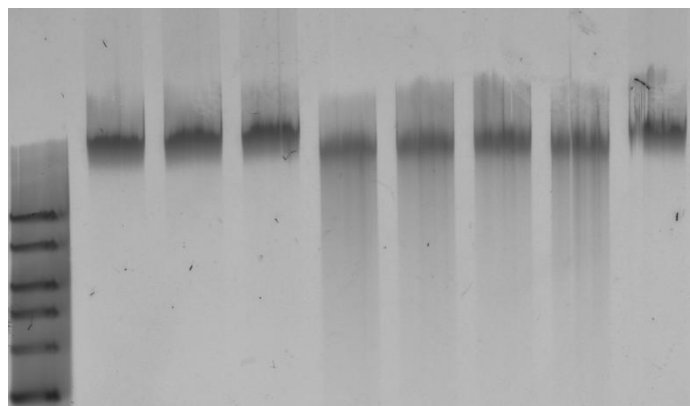

**M**    **1**    **2**    **3**    **4**    **5**    **6**    **7**    **8**

### Supplemental Figure 3

A

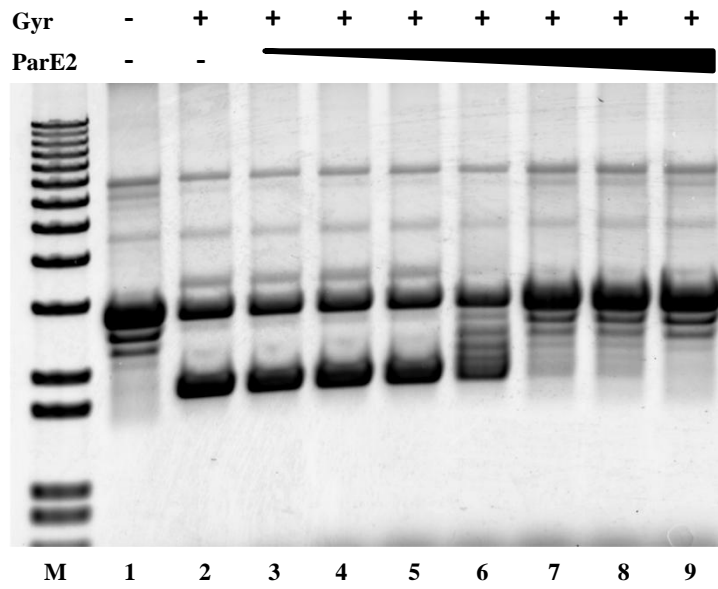

B

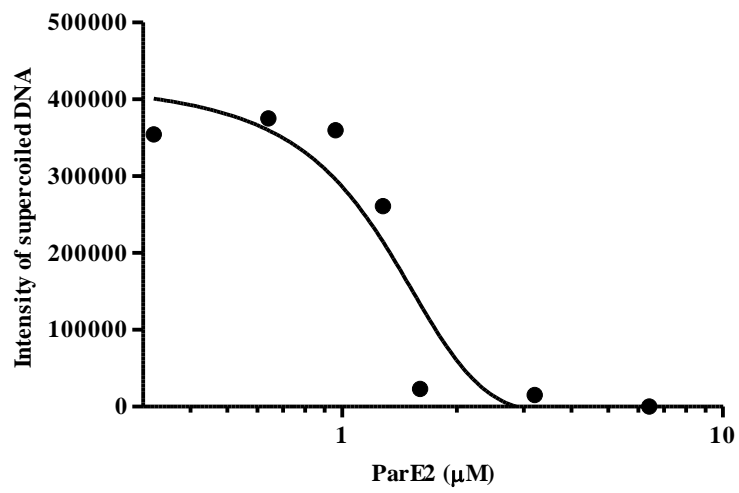

# Supplemental Figure 4

**A**

|             |   |   |   |   |   |   |
|-------------|---|---|---|---|---|---|
| $A_{59}B_2$ | - | + | - | + | - | + |
| Nal         | - | - | + | + | - | - |
| ParE2       | - | - | - | - | + | + |

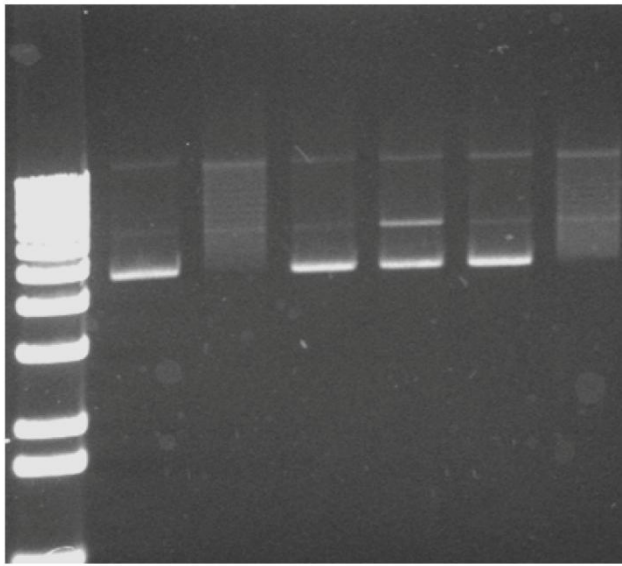

M 1 2 3 4 5 6

**B**

|             |   |   |   |   |   |   |   |
|-------------|---|---|---|---|---|---|---|
| $A_{59}B_2$ | - | - | + | + | + | + | + |
| ParE2       | - | + | - | ▬ |   |   |   |

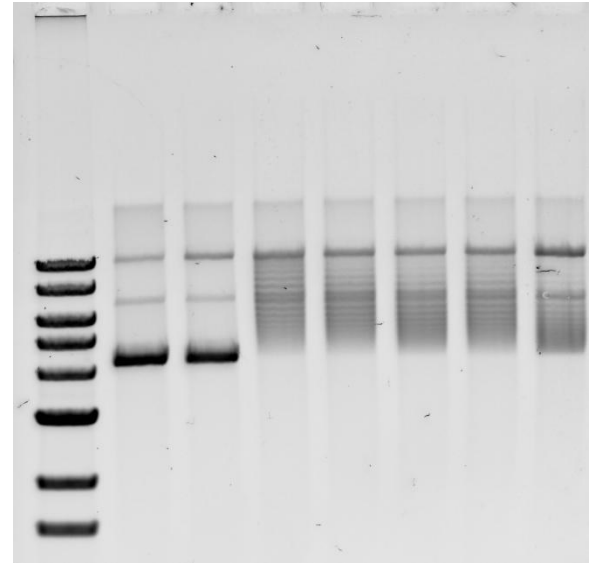

M 1 2 3 4 5 6 7

**Supplemental Figure 5**

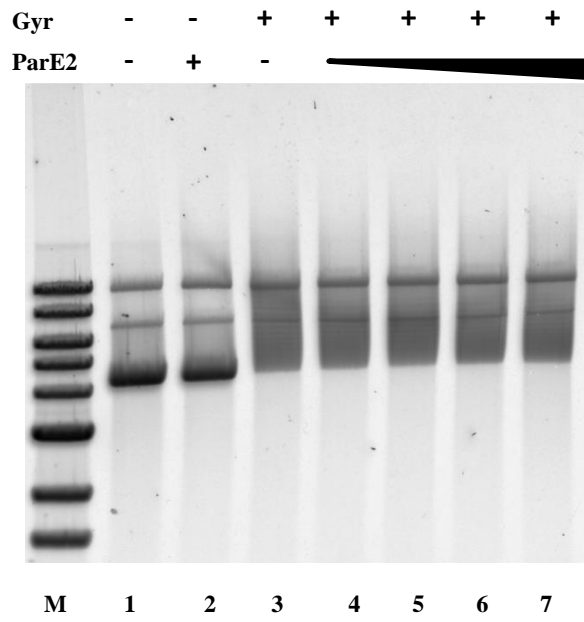

Supplemental Figure 6

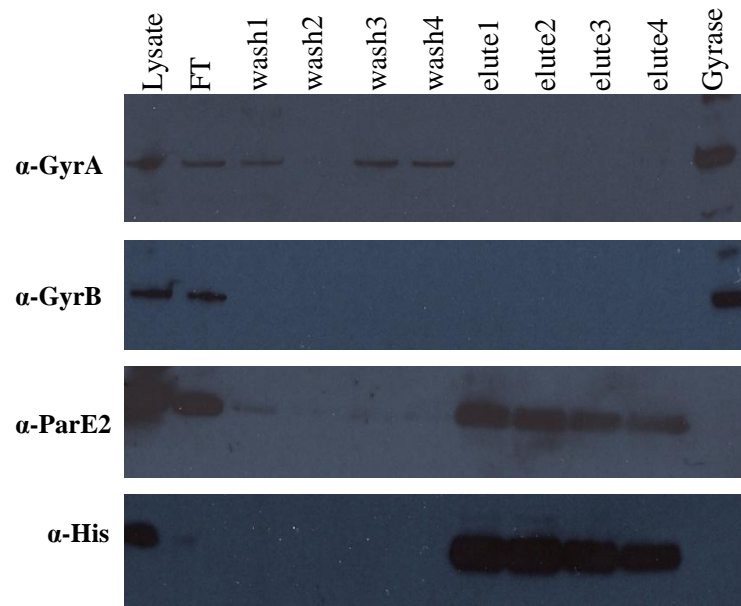

Supplement: supp_M110.138776_jbc.M110.138776-1.pdf [file supp_M110.138776_jbc.M110.138776-1.pdf]
